# Supplementary material for: Inspiratory hyperoxia suppresses lung cancer metastasis through a MYC/SLC1A5-dependent metabolic pathway
Source: PubMed Central journal article supplement — Eur Respir J. 2022 Dec 1;60(6):2200062. doi: 10.1183/13993003.00062-2022 (PMC9712851; doi:10.1183/13993003.00062-2022), 2022-12-01

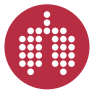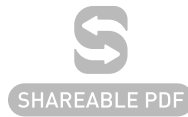

# Inspiratory hyperoxia suppresses lung cancer metastasis through a MYC/SLC1A5-dependent metabolic pathway

Xiucheng Liu<sup>1,2,3,4,7</sup>, Hao Qin<sup>2,7</sup>, Zheng Li<sup>5,7</sup>, Yin Lv<sup>2</sup>, Shoujie Feng<sup>2</sup>, Wei Zhuang<sup>6</sup>, Xiaoyu Quan<sup>2</sup>, Chen Guo<sup>2</sup>, Chang Chen<sup>3,4,8</sup> and Hao Zhang<sup>1,2,8</sup>

<sup>1</sup>Thoracic Surgery Laboratory, Xuzhou Medical University, Xuzhou, China. <sup>2</sup>Department of Thoracic Surgery, Affiliated Hospital of Xuzhou Medical University, Xuzhou, China. <sup>3</sup>Shanghai Engineering Research Center of Lung Transplantation, Shanghai, China. <sup>4</sup>Department of Thoracic Surgery, Shanghai Pulmonary Hospital, Tongji University School of Medicine, Shanghai, China. <sup>5</sup>Department of Thoracic Surgery, Huadong Hospital Affiliated to FuDan University, Shanghai, China. <sup>6</sup>Shanghai Key Laboratory of Signaling and Disease Research, School of Life Sciences and Technology, Tongji University, Shanghai, China. <sup>7</sup>Xiucheng Liu, Hao Qin and Zheng Li contributed equally to this work. <sup>8</sup>Hao Zhang and Chang Chen contributed equally to this article as lead authors and co-corresponding authors.

Corresponding author: Hao Zhang ([zhanghao@xzhmu.edu.cn](mailto:zhanghao@xzhmu.edu.cn))

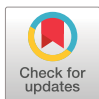

Shareable abstract (@ERSpublications)

**Inspiratory hyperoxia is beneficial to lung cancer patients** <https://bit.ly/3wLDami>

**Cite this article as:** Liu X, Qin H, Li Z, *et al.* Inspiratory hyperoxia suppresses lung cancer metastasis through a MYC/SLC1A5-dependent metabolic pathway. *Eur Respir J* 2022; 60: 2200062 [DOI: 10.1183/13993003.00062-2022].

This single-page version can be shared freely online.

Copyright ©The authors 2022.

This version is distributed under the terms of the Creative Commons Attribution Non-Commercial Licence 4.0. For commercial reproduction rights and permissions contact [permissions@ersnet.org](mailto:permissions@ersnet.org)

This article has an editorial commentary:  
<https://doi.org/10.1183/13993003.01357-2022>

Received: 11 Jan 2022  
Accepted: 18 May 2022

## Abstract

The lack of knowledge about the effect of inspiratory hyperoxia on the lung-specific tumour microenvironment and progression of lung cancer has attracted considerable attention. This study proposes that inspiratory hyperoxia has special significance for the malignant phenotype of lung cancer cells. The effects of different oxygenation parameters on the proliferation, apoptosis, invasion and migration of lung cancer cells were systematically evaluated *in vitro* and *in vivo*. Our results reveal that inspiratory hyperoxia treatment (60% oxygen, 6 h·day<sup>-1</sup>) not only has no tumour progression-promoting effects, but also suppresses lung cancer metastasis and promotes long-term survival. In addition, we combined transcriptome, proteome and metabolome analysis and found that hyperoxia treatment induced significant intracellular metabolic changes in lung cancer cells. Overall, we established that MYC/SLC1A5-induced metabolic reprogramming and glutamine addiction is a new mechanism that drives lung cancer metastasis, which can be significantly suppressed by inspiratory hyperoxia treatment. These findings are relevant to the debate on the perils, promises and antitumour effect of inspiratory hyperoxia, especially for patients with lung cancer.

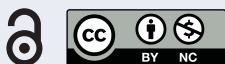

Supplement: ERJ-00062-2022.Shareable.pdf [file ERJ-00062-2022.Shareable.pdf]
